# Supplementary material for: The relationship between age related changes in strength and fitness with body size, shape and composition
Source: Springer Nature journal article supplement (doi:10.1038/s41598-025-93828-2), 2025-03-21
Supplement: MOESM2 [file 41598_2025_93828_MOESM2_ESM.pdf]

Supplementary material for

The relationship between age related changes in strength and fitness with anthropometric markers  
by Schulte et al.

Supplementary Figure 1

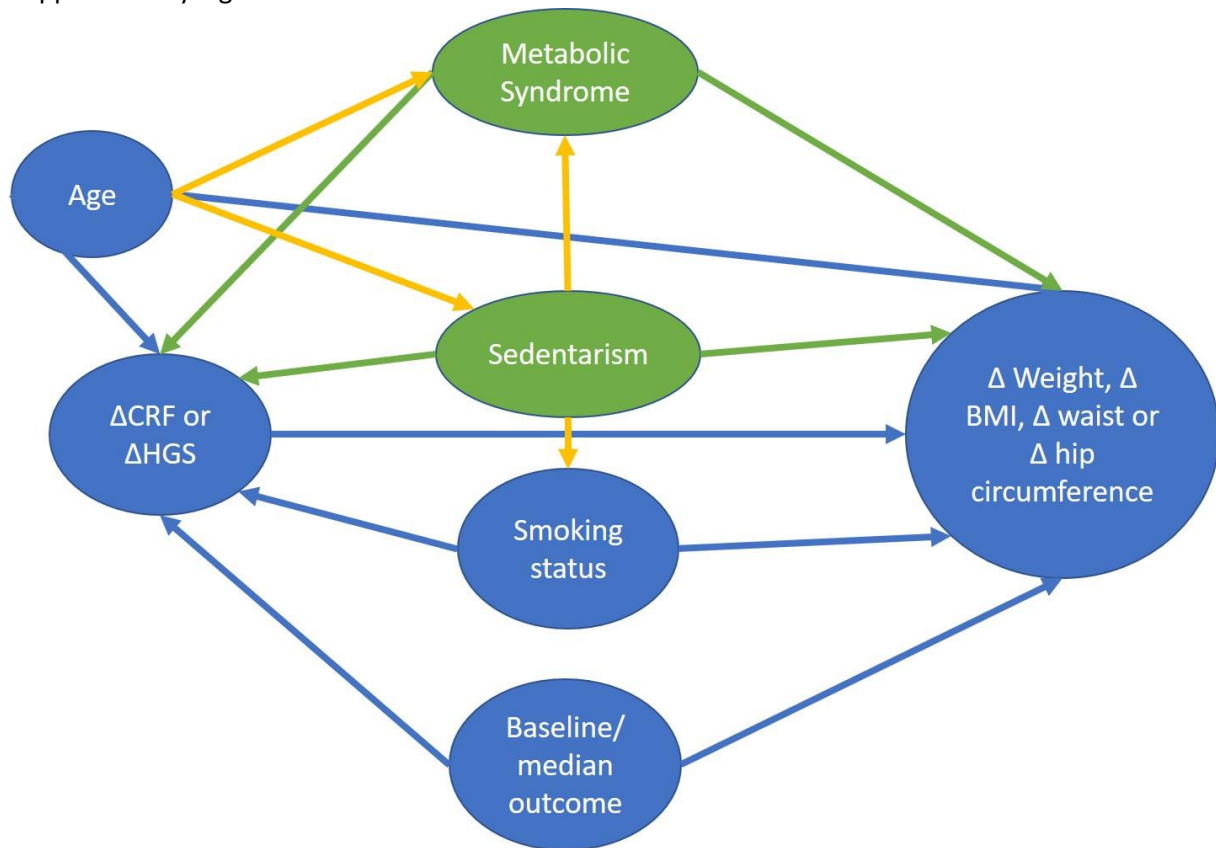

Supplementary Figure 1 – Directed acyclic graph for the relationship between  $\Delta$ CRF or  $\Delta$ HGS with  $\Delta$ weight, body mass index, hip or waist circumference, abbreviations: BMI – body mass index, CRF – cardio-respiratory fitness, HGS – hand grip strength

Supplementary Figure 2

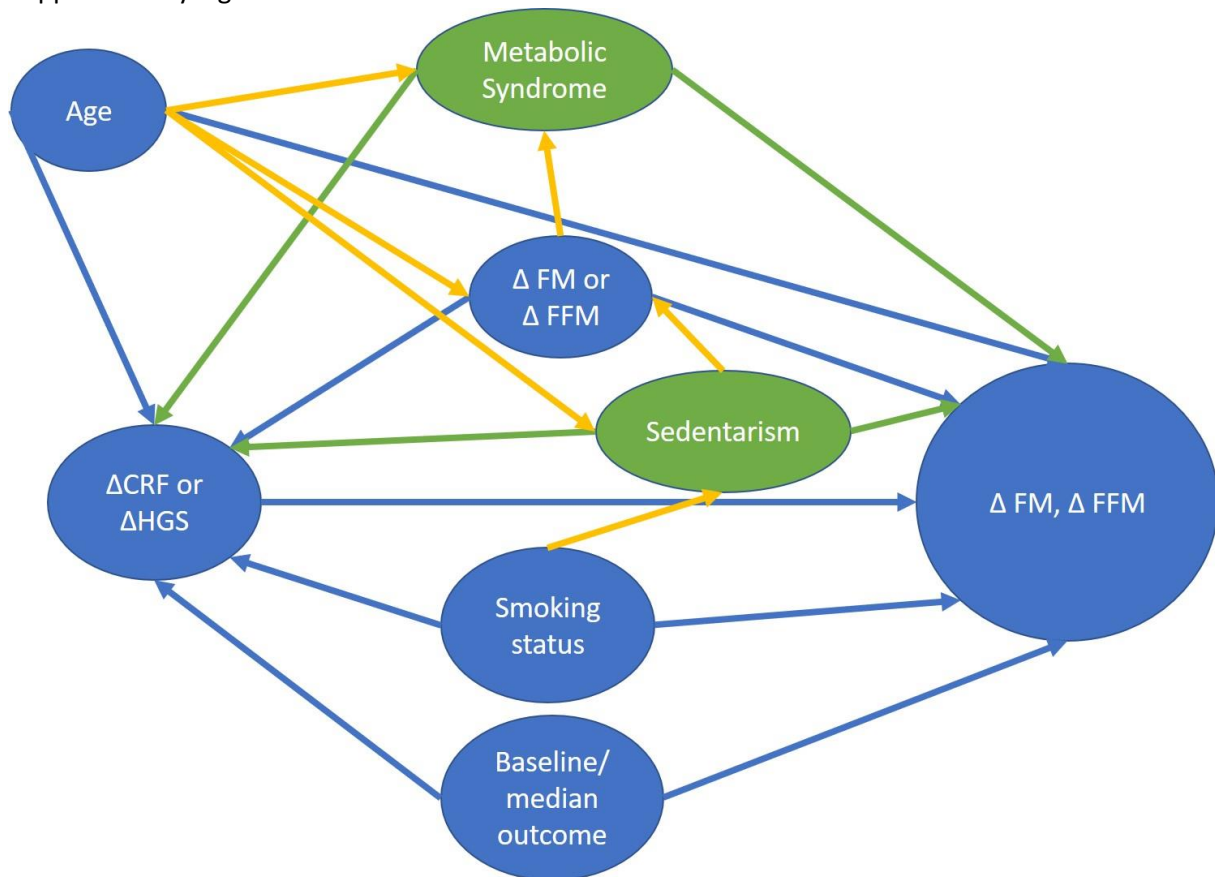

Supplementary Figure 2 – Directed acyclic graph for the relationship between  $\Delta\text{CRF}$  or  $\Delta\text{HGS}$  with  $\Delta\text{FM}$  or  $\text{FFM}$ . Abbreviations: BMI – body mass index, CRF – cardio-respiratory fitness, FM – fat mass, FFM – fat free mass, HGS – hand grip strength

Suppl. Table 1: Relationship between change in weight, BMI, waist circumference, hip circumference, fat-mass and fat free mass with hand grip strength and peak oxygen uptake

|                                        | 5-year-changes in weight            |                            | 5-year-changes in BMI       |                            | 5-year-changes in waist circumference |                            |
|----------------------------------------|-------------------------------------|----------------------------|-----------------------------|----------------------------|---------------------------------------|----------------------------|
|                                        | Men<br>β (95%-CI)                   | Women<br>β (95%-CI)        | Men<br>β (95%-CI)           | Women<br>β (95%-CI)        | Men<br>β (95%-CI)                     | Women<br>β (95%-CI)        |
| 5-year-changes in HGS                  | 0.008<br>(-0.047 ; 0.064)           | -0.025<br>(-0.092; 0.041)  | -0.001<br>(-0.019 ; 0.016)  | -0.011<br>(-0.035 ; 0.013) | -0.030<br>(-0.087 ; 0.026)            | -0.072<br>(-0.152 ; 0.007) |
| 5-year-changes in VO <sub>2</sub> peak | 1.101<br>(-0.035 ; 2.237)           | -0.192<br>(-1.656 ; 1.272) | 0.245<br>(-0.114 ; 0.605)   | -0.070<br>(-0.603 ; 0.463) | 0.163<br>(-1.055 ; 1.380)             | -0.606<br>(-2.515 ; 1.302) |
|                                        | 5-year-changes in hip circumference |                            | 5-year-changes in FM        |                            | 5-year-changes in FFM                 |                            |
|                                        | Men<br>β (95%-CI)                   | Women<br>β (95%-CI)        | Men<br>β (95%-CI)           | Women<br>β (95%-CI)        | Men<br>β (95%-CI)                     | Women<br>β (95%-CI)        |
| 5-year-changes in HGS                  | -0.029<br>(-0.079 ; 0.021)          | -0.027<br>(-0.094 ; 0.040) | -0.0003<br>(-0.055 ; 0.054) | 0.015<br>(-0.051 ; 0.081)  | 0.027<br>(-0.019 ; 0.073)             | 0.013<br>(-0.024 ; 0.050)  |
| 5-year-changes in VO <sub>2</sub> peak | 0.159<br>(-0.891 ; 1.209)           | 0.475<br>(-1.149; 2.099)   | 0.606<br>(-0.400 ; 1.613)   | -0.255<br>(-1.589; 1.079)  | <b>0.867</b><br><b>(0.004; 1.730)</b> | 0.421<br>(-0.363 ; 1.205)  |

Model (1) was adjusted for age, baseline outcome, smoking baseline and follow-up. FM is additionally adjusted for FFM and vice versa. Abbreviations: BMI – body mass index, FM – fat mass, FFM – fat free mass, HGS – hand grip strength, VO<sub>2</sub>peak – peak oxygen uptake

Suppl. Table 2: Relationship between change in weight, BMI, waist circumference, hip circumference, fat-mass and fat free mass with hand grip strength and peak oxygen uptake adjusted for model (2).

|                                        | 5-year-changes in weight               |                            | 5-year-changes in BMI      |                            | 5-year-changes in waist circumference |                            |
|----------------------------------------|----------------------------------------|----------------------------|----------------------------|----------------------------|---------------------------------------|----------------------------|
|                                        | Men<br>$\beta$ (95%-CI)                | Women<br>$\beta$ (95%-CI)  | Men<br>$\beta$ (95%-CI)    | Women<br>$\beta$ (95%-CI)  | Men<br>$\beta$ (95%-CI)               | Women<br>$\beta$ (95%-CI)  |
| 5-year-changes in HGS                  | 0.012<br>(-0.043 ; 0.067)              | -0.023<br>(-0.088 ; 0.043) | 0.0003<br>(-0.017 ; 0.018) | -0.010<br>(-0.034 ; 0.014) | -0.026<br>(-0.081 ; 0.029)            | -0.076<br>(-0.154 ; 0.002) |
| 5-year-changes in VO <sub>2</sub> peak | <b>1.148</b><br><b>(0.040 ; 2.256)</b> | -0.543<br>(-1.997 ; 0.911) | 0.258<br>(-0.092 ; 0.609)  | -0.212<br>(-0.740 ; 0.316) | 0.235<br>(-0.949 ; 1.420)             | -0.764<br>(-2.673 ; 1.146) |
|                                        | 5-year-changes in hip circumference    |                            | 5-year-changes in FM       |                            | 5-year-changes in FFM                 |                            |
|                                        | Men<br>$\beta$ (95%-CI)                | Women<br>$\beta$ (95%-CI)  | Men<br>$\beta$ (95%-CI)    | Women<br>$\beta$ (95%-CI)  | Men<br>$\beta$ (95%-CI)               | Women<br>$\beta$ (95%-CI)  |
| 5-year-changes in HGS                  | -0.029<br>(-0.078 ; 0.019)             | -0.021<br>(-0.088 ; 0.046) | 0.006<br>(-0.048 ; 0.060)  | 0.014<br>(-0.051 ; 0.079)  | 0.032<br>(-0.014 ; 0.078)             | 0.016<br>(-0.020 ; 0.053)  |
| 5-year-changes in VO <sub>2</sub> peak | 0.203<br>(-0.822 ; 1.227)              | 0.395<br>(-1.230 ; 2.020)  | 0.601<br>(-0.396 ; 1.598)  | -0.575<br>(-1.903 ; 0.753) | 0.856<br>(-0.003 ; 1.716)             | 0.400<br>(-0.391 ; 1.192)  |

Model (2) was adjusted for PA, metabolic syndrome, age, baseline outcome, smoking baseline and follow-up. FM is additionally adjusted for FFM and vice versa. Abbreviations: 95%-CI – 95% confidence interval, PA – physical activity, BMI – body mass index, FM – fat mass, FFM – fat free mass, HGS – hand grip strength, VO<sub>2</sub>peak – peak oxygen uptake

Suppl. Table 3: Relationship between change in weight, BMI, waist circumference, hip circumference, fat-mass and fat free mass with hand grip strength and peak oxygen uptake adjusted for median outcome instead of baseline.

|                                        | 5-year-changes in weight            |                            | 5-year-changes in BMI     |                            | 5-year-changes in waist circumference |                            |
|----------------------------------------|-------------------------------------|----------------------------|---------------------------|----------------------------|---------------------------------------|----------------------------|
|                                        | Men<br>$\beta$ (95%-CI)             | Women<br>$\beta$ (95%-CI)  | Men<br>$\beta$ (95%-CI)   | Women<br>$\beta$ (95%-CI)  | Men<br>$\beta$ (95%-CI)               | Women<br>$\beta$ (95%-CI)  |
| 5-year-changes in HGS                  | 0.029<br>(-0.025 ; 0.084)           | 0.0008<br>(-0.065 ; 0.067) | 0.006<br>(-0.011 ; 0.024) | -0.002<br>(-0.026 ; 0.022) | -0.004<br>(-0.060 ; 0.052)            | -0.025<br>(-0.102 ; 0.051) |
| 5-year-changes in VO <sub>2</sub> peak | 0.986<br>(-0.138 ; 2.111)           | -0.461<br>(-1.896 ; 0.975) | 0.235<br>(-0.120 ; 0.591) | -0.166<br>(-0.686 ; 0.354) | 0.014<br>(-1.187 ; 1.215)             | -1.145<br>(-2.981 ; 0.691) |
|                                        | 5-year-changes in hip circumference |                            | 5-year-changes in FM      |                            | 5-year-changes in FFM                 |                            |
|                                        | Men<br>$\beta$ (95%-CI)             | Women<br>$\beta$ (95%-CI)  | Men<br>$\beta$ (95%-CI)   | Women<br>$\beta$ (95%-CI)  | Men<br>$\beta$ (95%-CI)               | Women<br>$\beta$ (95%-CI)  |
| 5-year-changes in HGS                  | 0.0001<br>(-0.048 ; 0.048)          | 0.008<br>(-0.059 ; 0.074)  | 0.031<br>(-0.022 ; 0.084) | 0.024<br>(-0.040 ; 0.087)  | 0.036<br>(-0.011 ; 0.082)             | 0.026<br>(-0.012 ; 0.065)  |
| 5-year-changes in VO <sub>2</sub> peak | 0.113<br>(-0.894 ; 1.119)           | 0.145<br>(-1.469 ; 1.759)  | 0.428<br>(-0.547 ; 1.404) | -0.913<br>(-2.225 ; 0.398) | 0.799<br>(-0.076 ; 1.674)             | 0.648<br>(-0.144 ; 1.440)  |

Model (3) was adjusted for median outcome instead of baseline as well as age, smoking status at baseline and follow-up. FM is

additionally adjusted for FFM and vice versa. Abbreviations: 95%-CI – 95% confidence interval, BMI – body mass index, FM – fat mass, FFM – fat free mass, HGS – hand grip strength, VO<sub>2</sub>peak – peak oxygen uptake

Supp. Table 4: Relationship between change in weight, BMI, waist circumference, hip circumference, fat-mass and fat free mass with hand grip strength and peak oxygen uptake stratified by menopause status.

|                                        |               | 5-year-changes in weight<br>$\beta$ (95%-CI)            | 5-year-changes in BMI<br>$\beta$ (95%-CI) | 5-year-changes in waist circumference<br>$\beta$ (95%-CI) |
|----------------------------------------|---------------|---------------------------------------------------------|-------------------------------------------|-----------------------------------------------------------|
| 5-year-changes in HGS                  | Menopause No  | -0.049 (-0.138 ; 0.039)                                 | -0.017 (-0.050 ; 0.016)                   | -0.054 (-0.164 ; 0.056)                                   |
|                                        | Menopause Yes | 0.010 (-0.090 ; 0.110)                                  | -0.001 (-0.036 ; 0.034)                   | -0.078 (-0.192 ; 0.034)                                   |
| 5-year-changes in VO <sub>2</sub> peak | Menopause No  | 0.487 (-1.792 ; 2.766)                                  | 0.231 (-0.616 ; 1.078)                    | 0.294 (-2.828 ; 3.416)                                    |
|                                        | Menopause Yes | -0.643 (-2.272 ; 1.288)                                 | -0.272 (-0.956 ; 0.411)                   | -1.179 (-3.536 ; 1.177)                                   |
|                                        |               | 5-year-changes in hip circumference<br>$\beta$ (95%-CI) | 5-year-changes in FM<br>$\beta$ (95%-CI)  | 5-year-changes in FFM<br>$\beta$ (95%-CI)                 |
| 5-year-changes in HGS                  | Menopause No  | -0.035 (-0.124 ; 0.053)                                 | -0.008 (-0.100 ; 0.084)                   | 0.010 (-0.044 ; 0.063)                                    |
|                                        | Menopause Yes | -0.009 (-0.110 ; 0.093)                                 | 0.051 (-0.044 ; 0.147)                    | 0.016 (-0.035 ; 0.067)                                    |
| 5-year-changes in VO <sub>2</sub> peak | Menopause No  | 0.086 (-2.259 ; 2.432)                                  | 0.193 (-1.891 ; 2.278)                    | 0.461 (-0.810 ; 1.731)                                    |
|                                        | Menopause Yes | 0.899 (-1.424 ; 3.222)                                  | -0.497 (-2.272 ; 1.278)                   | 0.274 (-0.726 ; 1.274)                                    |

Abbreviations: 95%-CI – 95% confidence interval, BMI – body mass index, FM – fat mass, FFM – fat free mass, HGS – hand grip strength, VO<sub>2</sub>peak – peak oxygen uptake

Suppl. Table 5: R<sup>2</sup> for the relationship between change in weight, BMI, waist circumference, hip circumference, fat-mass and fat free mass with hand grip strength and peak oxygen uptake

|                                        | 5-year-changes in weight            |                      | 5-year-changes in BMI |                      | 5-year-changes in waist circumference |                      |
|----------------------------------------|-------------------------------------|----------------------|-----------------------|----------------------|---------------------------------------|----------------------|
|                                        | Men R <sup>2</sup>                  | Women R <sup>2</sup> | Men R <sup>2</sup>    | Women R <sup>2</sup> | Men R <sup>2</sup>                    | Women R <sup>2</sup> |
| 5-year-changes in HGS                  | 0.1096                              | 0.0779               | 0.0800                | 0.0520               | 0.0338                                | 0.0169               |
| 5-year-changes in VO <sub>2</sub> peak | 0.1114                              | 0.0790               | 0.0821                | 0.0523               | 0.0338                                | 0.0119               |
|                                        | 5-year-changes in hip circumference |                      | 5-year-changes in FM  |                      | 5-year-changes in FFM                 |                      |
|                                        | Men R <sup>2</sup>                  | Women R <sup>2</sup> | Men R <sup>2</sup>    | Women R <sup>2</sup> | Men R <sup>2</sup>                    | Women R <sup>2</sup> |
| 5-year-changes in HGS                  | 0.0198                              | 0.0389               | 0.1467                | 0.0780               | 0.2047                                | 0.1251               |
| 5-year-changes in VO <sub>2</sub> peak | 0.0225                              | 0.0247               | 0.1804                | 0.0936               | 0.2265                                | 0.0930               |

Model (1) was adjusted for age, baseline outcome, smoking baseline and follow-up.

FM is additionally adjusted for FFM and vice versa. Abbreviations: BMI – body mass index, FM – fat mass, FFM – fat free mass, HGS – hand grip strength, VO<sub>2</sub>peak – peak oxygen uptake
